# Supplementary material for: A Narrative Review on Pediatric Scurvy: The Last Twenty Years
Source: MDPI journal article supplement (doi:10.3390/nu14030684), 2022-02-06
Supplement: s1 [file s1]

## Supplementary Materials

**Table S1.** Epidemiological and clinical data, laboratory and radiological findings, treatment and outcome of the selected papers in the narrative review

| Author<br>Year           | #<br>cases | Median<br>age<br>(months) | Male<br>(%) | Comorbidity<br>(%)                      | Clinical manifestations<br>(n, %)                                                                       | Laboratory data<br>(n, %)                                                                                        | Radiological findings                                                                                                                                                                                                                                                                           | Therapy<br>Vitamin C                            | Outcome<br>Timing<br>(%) |
|--------------------------|------------|---------------------------|-------------|-----------------------------------------|---------------------------------------------------------------------------------------------------------|------------------------------------------------------------------------------------------------------------------|-------------------------------------------------------------------------------------------------------------------------------------------------------------------------------------------------------------------------------------------------------------------------------------------------|-------------------------------------------------|--------------------------|
| Ceglie et al 2018 [18]   | 3          | 29                        | 100%        | 0                                       | Musculoskeletal: 3 (100%)<br>-leg pain/refusal to walk 2<br>-limping, arthritis 1                       | Anemia: 2 (67%)<br><br>Vitamin D $\Delta$ : 2 (67%)<br>Folate $\Delta$ : 1 (33%)<br><br>Hypoalbuminemia: 1 (33%) | RX<br>osteopenia, Frankel's lines, Trummerfeld zone 1<br>widening of the anterior rib ends at costochondral junctions, Frankel's lines 1<br>MRI<br>inflammatory alterations of the soft tissue and cortical bone 1                                                                              | IV followed by oral 2 (67%)<br><br>Oral 1 (33%) | Recovery 1 month (100%)  |
|                          |            |                           |             |                                         | Cutaneous: 1 (33%)<br>-petechiae 1                                                                      |                                                                                                                  |                                                                                                                                                                                                                                                                                                 |                                                 |                          |
|                          |            |                           |             |                                         | Mucous: 2 (67%)<br>-gingival swelling 2                                                                 |                                                                                                                  |                                                                                                                                                                                                                                                                                                 |                                                 |                          |
|                          |            |                           |             |                                         | Malaise/anorexia: 2 (67%)<br>Poor nutritional status 2 (67%)                                            |                                                                                                                  |                                                                                                                                                                                                                                                                                                 |                                                 |                          |
| Chalouhi et al 2020 [45] | 3          | 36                        | 33%         | 0                                       | Musculoskeletal: 3 (100%)<br>-leg pain/refusal to walk 3                                                | -                                                                                                                | RX<br>osteopenia, Frankel's lines, Trummerfeld zone 1<br>vertebral osteopenia 1<br>normal 1<br>MRI<br>metaphyseal symmetric bone-marrow signal changes of long bones 1<br>multifocal symmetric bone-marrow signal anomalies at the metaphysis, subperiosteal collections, periosteal reaction 1 | Oral: 3 (100%)                                  | Recovery (100%)          |
|                          |            |                           |             |                                         | Cutaneous: 1 (33%)<br>-inflammatory hair follicles 1                                                    |                                                                                                                  |                                                                                                                                                                                                                                                                                                 |                                                 |                          |
|                          |            |                           |             |                                         | Mucous: 2 (67%)<br>-hyperemic gums 1<br>-conjunctival bleeding 1                                        |                                                                                                                  |                                                                                                                                                                                                                                                                                                 |                                                 |                          |
|                          |            |                           |             |                                         | Irritability: 3 (100%)<br>Malaise/anorexia: 2 (67%)<br>Fever: 1 (33%)<br>Poor nutritional status 1(33%) |                                                                                                                  |                                                                                                                                                                                                                                                                                                 |                                                 |                          |
| De Ioris et al 2016 [5]  | 4          | -                         | -           | 100%<br>cerebral palsy 3<br>Rett's S. 1 | Musculoskeletal: 3 (75%)<br>-leg pain 3<br>-arthritis 2                                                 | Anemia: 2 (50%)                                                                                                  | -                                                                                                                                                                                                                                                                                               | Oral: 4 (100%)                                  | Recovery 3 months (100%) |
|                          |            |                           |             |                                         | Cutaneous: 3 (75%)<br>-petechiae, ecchymosis 3                                                          |                                                                                                                  |                                                                                                                                                                                                                                                                                                 |                                                 |                          |

|                              |    |     |      |                                                                                 |                                                                                                                                                                                                                                                                                                                                                                             |                                                                                            |                                                                                                                                                                                      |                                                   |                                                        |
|------------------------------|----|-----|------|---------------------------------------------------------------------------------|-----------------------------------------------------------------------------------------------------------------------------------------------------------------------------------------------------------------------------------------------------------------------------------------------------------------------------------------------------------------------------|--------------------------------------------------------------------------------------------|--------------------------------------------------------------------------------------------------------------------------------------------------------------------------------------|---------------------------------------------------|--------------------------------------------------------|
|                              |    |     |      |                                                                                 | Mucous: 3 (75%)<br>- gingival swelling 3<br>- gingival bleeding 2<br>Irritability: 3 (75%)                                                                                                                                                                                                                                                                                  |                                                                                            |                                                                                                                                                                                      |                                                   |                                                        |
| Fortenberry et al, 2020 [49] | 5  | 120 | 100% | 100%<br>autism 5<br>cerebral palsy 1<br>ADHD 1                                  | Musculoskeletal: 5 (100%)<br>- leg pain/refusal to walk 3<br>- limping 2<br>- arthritis 1<br>- leg edema<br>- back pain<br>Cutaneous: 4 (80%)<br>- petechiae 4<br>- ecchymosis 2<br>- perifollicular hemorrhages 1<br>Mucous: 4 (80%)<br>- gingival swelling 4<br>- gingival bleeding 4<br>- epistaxis 1<br>Fever: 3 (60%)<br>Hyperreactivity: 1 (20%)<br>Anorexia: 1 (20%) | Anemia: 2 (40%)<br>Vitamin D Δ: 4 (80%)<br>Vitamin B12 Δ: 1 (20%)<br>Vitamin B1 Δ: 1 (20%) | RX<br>osteopenia 2<br>normal 1<br>MRI<br>enhancement of the margins of sacrum and ilium, the posterior iliac bones, and the pelvis apophyses 1                                       | Oral 3 (60%)<br>IV followed by oral 1<br>rectal 1 | Lost at FU 3 (60%)<br>Improvement at discharge 2 (40%) |
| Golriz et al 2016 [3]        | 32 | 132 | 59%  | 100%<br>TIRO 20<br>BMTR 3<br>Autism 3<br>DD 1<br>fructose intol. 1<br>neglect 1 | -                                                                                                                                                                                                                                                                                                                                                                           | -                                                                                          | RX<br>Frankel line 3; Trummerfeld zone 3<br>MRI<br>increased T2 signal in the bone marrow of metaphyses, periosteal reaction and edema at femurs and tibias 3<br>soft tissue edema 2 | -                                                 | -                                                      |
| Gulko et al 2014 [47]        | 4  | 48  | 100% | 100%<br>autism 2<br>Asperger's 1<br>DD 1                                        | Musculoskeletal: 4 (100%)<br>- leg pain/refusal to walk 4<br>- arthritis 1<br>Cutaneous: 2 (50%)<br>- petechiae 1<br>- ecchymosis 1                                                                                                                                                                                                                                         | High inflammatory markers: 2 (50%)<br>high CRP 1<br>high ESR 1<br>Vitamin D Δ: 1 (25%)     | RX<br>normal 1<br>physeal widening with Frankel's lines 3<br>small metaphyseal fracture 1<br>MRI<br>multifocal symmetric signal abnormality                                          | Oral: 4 (100%)                                    | Improvement 4 (100%)                                   |

|                                            |   |    |      |                         |                                                                                                                                                                                                                                               |                                                                                                                                    |                                                                                                                                                                                                                                                                                                                                                        |                |                                            |
|--------------------------------------------|---|----|------|-------------------------|-----------------------------------------------------------------------------------------------------------------------------------------------------------------------------------------------------------------------------------------------|------------------------------------------------------------------------------------------------------------------------------------|--------------------------------------------------------------------------------------------------------------------------------------------------------------------------------------------------------------------------------------------------------------------------------------------------------------------------------------------------------|----------------|--------------------------------------------|
|                                            |   |    |      |                         | -hyperkeratosis 1<br>Mucous: 2 (50%)<br>-gingival swelling 1<br>-gingival bleeding 1                                                                                                                                                          | Vitamin A Δ: 1 (25%)                                                                                                               | at metaphyses with bone marrow enhancement 1<br>multifocal symmetric low signal on T1 and high signal on T2 at metaphyses; periosteal reaction; bone marrow enhancement 1<br>low signal on T1 and high signal on T2 at metaphyses 1<br>low signal on T1 and high signal on T2 at metaphyses; periosteal reaction; bone marrow enhancement 1            |                |                                            |
| Kitcharoen<br>sakkul et al<br>2014<br>[50] | 3 | 5  | 67%  | 67%<br>DD 2<br>autism 1 | Musculoskeletal: 3 (100%)<br>-leg pain/refusal to walk 3<br>Cutaneous: 1 (33%)<br>-hyperkeratosis 1<br>Mucous: 2 (67%)<br>-gingival swelling 2<br>-gingival bleeding 2<br>Poor nutritional status: 1 (33%)                                    | High inflammatory markers: 1 (33%)<br>ESR 30 mm/h<br>Vitamin D Δ: 2 (67%)<br>Vitamin A Δ: 1 (33%)                                  | RX<br>Diffuse osteopenia, metaphyseal sclerotic lines 1<br>Frankel's lines in distal femur and proximal tibia 1<br>osteopenia and growth arrest lines in distal femurs and proximal tibias 1<br>MRI<br>Normal 1<br>Bone marrow edema with bilateral enhancement of distal femoral and proximal tibial metaphyses, edema of the periosteum and muscle 1 | Oral: 3 (100%) | Lost at FU: 1 (33%)<br>Improvement 2 (67%) |
| Ma et al<br>2015<br>[4]                    | 7 | 96 | 100% | 100%<br>DD 7            | Musculoskeletal: 7 (100%)<br>-leg pain/refusal to walk 7<br>-upper limb pain 1<br>Cutaneous: 5 (71%)<br>-petechiae, ecchymosis 5<br>-perifollicular rash 1<br>Mucous: 5 (71%)<br>-gingival swelling 5<br>-gingival bleeding 5<br>-epistaxis 1 | High inflammatory markers: 2 (29%)<br>ESR 44-30 mm/h<br>CRP unspecified-1.8 mg/dl<br>Vitamin D Δ: 5 (71%)<br>Vitamin B1 Δ: 2 (29%) | RX<br>Widening and irregularity of bilateral distal femoral and proximal tibial physis 1<br>Normal 1<br>upon review, widening of the physis and Frankel's line 1<br>non-specified alterations 4<br>MRI<br>Bone marrow signal abnormalities at distal femur 1                                                                                           | Oral: 7 (100%) | Recovery 1-2 months (100%)                 |

|                          |   |    |      |                                                         |                                                                                                                                                                                                                                                                                                                             |                                                                                                                                                                                                                                                              |                                                                                                                                                                                                                                                                                                                                                                                |                                                   |                             |
|--------------------------|---|----|------|---------------------------------------------------------|-----------------------------------------------------------------------------------------------------------------------------------------------------------------------------------------------------------------------------------------------------------------------------------------------------------------------------|--------------------------------------------------------------------------------------------------------------------------------------------------------------------------------------------------------------------------------------------------------------|--------------------------------------------------------------------------------------------------------------------------------------------------------------------------------------------------------------------------------------------------------------------------------------------------------------------------------------------------------------------------------|---------------------------------------------------|-----------------------------|
|                          |   |    |      |                                                         | Malaise: 2 (29%)<br>Poor nutritional status: 1 (14%)                                                                                                                                                                                                                                                                        | Vitamin B6 Δ: 2 (29%)<br>Vitamin A Δ: 1 (14%)                                                                                                                                                                                                                | Epiphyseal signal and diffuse infiltrative marrow process in femur and tibia metaphyses, edema and enhancement in soft tissues 1<br>Symmetric marrow edema and metaphyseal enhancement at femurs, tibias and fibulas; synovial enhancement and myositis 1<br>Bone marrow T2 hyperintensity and enhancement of the femoral metaphyseal, pelvis 1<br>Non-specified alterations 1 |                                                   |                             |
| Pan et al 2021 [48]      | 9 | 72 | 78%  | 67% autism 4<br>hydrocephalus 1<br>tuberous sclerosis 1 | Musculoskeletal: 7 (78%)<br>-leg pain/refusal to walk 7<br>-limping 7<br>-limb edema 4<br>Cutaneous: 6 (67%)<br>-petechiae, ecchymosis 6<br>-perifollicular hemorrhage 2<br>Mucous: 4 (44%)<br>-gingival bleeding 3<br>-epistaxis 1<br>Malaise: 2 (22%)<br>Fever: 1 (11%)<br>PH: 1 (11%)<br>Poor nutritional status: 1(14%) | high inflammatory markers: 5 (55%), median ESR 22 mm/h<br>median CRP 1.1 mg/dl<br><br>Anemia: 5 (55%)<br><br>Vitamin D Δ: 5 (55%)<br>Vitamin B6 Δ: 2 (22%)<br>Vitamin B9 Δ: 2 (22%)<br>Vitamin B1 Δ: 1 (11%)<br>Vitamin A Δ: 1 (11%)<br>Vitamin K Δ: 1 (11%) | RX<br>Normal 2<br>Frankel's lines 6, Osteopenia 2, Wimberger ring 2, Trummerfeld zone 4, subperiosteal hemorrhage 2, Pelkan spur 1<br>MRI<br>increased signal and enhancement of the femoral, tibial, fibular metaphysis with bone marrow edema adjacent to the greater trochanter apophysis, osteitis of the femur 3                                                          | Oral: 6 (67%)<br><br>IV followed by oral: 3 (33%) | Recovery 1-11 months (100%) |
| Ratageri et al 2005 [44] | 3 | 12 | 100% | 100% infantile tremor syndrome                          | Musculoskeletal: 2 (67%)<br>-leg pain 2<br>Poor nutritional status: 3(100%)                                                                                                                                                                                                                                                 | Anemia: 3 (100%)                                                                                                                                                                                                                                             | RX<br>Frankel's lines 3                                                                                                                                                                                                                                                                                                                                                        | Oral: 3 (100%)                                    | Improvement (100%)          |

|                             |    |    |      |                                  |                                                                                            |                                                                                                                                      |                                                                                                                                                       |                               |                             |
|-----------------------------|----|----|------|----------------------------------|--------------------------------------------------------------------------------------------|--------------------------------------------------------------------------------------------------------------------------------------|-------------------------------------------------------------------------------------------------------------------------------------------------------|-------------------------------|-----------------------------|
| Ratanachu-E et al 2003 [53] | 28 | 29 | 60%  | 7% cerebral palsy 2              | Musculoskeletal: 25 (100%)<br>-leg pain/refusal to walk 25<br>-limping 24<br>-arthritis 13 | Anemia: 19 (68%)                                                                                                                     | RX<br>Frenkel's lines 28, osteopenia 22, Pelkan spur 9, Winberger ring 8, subepiphyseal infarction 4, epiphyseal separation 2                         | Oral: 28 (100%)               | recovery 1-4 weeks (100%)   |
|                             |    |    |      |                                  | Cutaneous: 1 (4%)<br>-Petechiae 1                                                          |                                                                                                                                      |                                                                                                                                                       |                               |                             |
|                             |    |    |      |                                  | Mucous: 12 (43%)<br>-gingival bleeding 12                                                  |                                                                                                                                      |                                                                                                                                                       |                               |                             |
|                             |    |    |      |                                  | Fever: 5 (21%)<br>PH 2 (7%)<br>Poor nutritional status 12 (43%)                            |                                                                                                                                      |                                                                                                                                                       |                               |                             |
| Rubino et al 2020 [46]      | 4  | 42 | 100% | 50% cerebral palsy 1<br>autism 1 | Musculoskeletal: 4 (100%)<br>-leg pain/refusal to walk 4<br>-arthritis 2                   | High inflammatory markers: 4 (100%)<br>median ESR 76 mm/h<br>median CRP 2.3 mg/dl<br><br>Anemia: 2 (50%)<br><br>Vitamin D Δ: 3 (75%) | RX<br>Frankel's lines 3, Trummerfeld zone 3, osteopenia 2, Pelkan spur 1<br>MRI<br>multifocal metaphyseal alterations 4                               | Oral: 4 (100%)                | Recovery 2- 4 weeks         |
|                             |    |    |      |                                  | Cutaneous: 3 (75%)<br>-petechiae, ecchymosis 3                                             |                                                                                                                                      |                                                                                                                                                       |                               |                             |
|                             |    |    |      |                                  | Mucous: 4 (100%)<br>-gingival bleeding 3<br>-gingival swelling 1                           |                                                                                                                                      |                                                                                                                                                       |                               |                             |
|                             |    |    |      |                                  | Irritability: 3 (75%)<br>Poor nutritional status 1 (25%)                                   |                                                                                                                                      |                                                                                                                                                       |                               |                             |
| Singh et al 2015 [75]       | 48 | -  | -    | 100% malnutrition 48             | -                                                                                          | -                                                                                                                                    | RX<br>typical scurvy alterations 48 (Winberger ring 41, Frankel's line 41, pencil-thin cortex 36, corner sign 21, Pelkan spur 12, Trummerfeld zone 2) | -                             | -                           |
| Swed-Tobia et al, 2019 [52] | 3  | 7  | 67%  | 100% Autism 3                    | Musculoskeletal: 3 (100%)<br>-leg pain/refusal to walk 3<br>-knee contracture 1            | High inflammatory markers: 2 (67%)<br><br>Anemia: 2 (67%)                                                                            | RX<br>normal 3<br>MRI<br>Intramedullary edema of vertebrae sacrum, sacroiliac joints, acetabulum, pubis, femurs 1                                     | IV followed by oral: 3 (100%) | Improvement few days (100%) |
|                             |    |    |      |                                  | Cutaneous: 3 (67%)<br>-petechiae, ecchymosis 3                                             |                                                                                                                                      |                                                                                                                                                       |                               |                             |

|  |  |  |  |  |                                         |  |                                                                                                   |  |  |
|--|--|--|--|--|-----------------------------------------|--|---------------------------------------------------------------------------------------------------|--|--|
|  |  |  |  |  | Mucous: 3 (67%)<br>-gingival bleeding 3 |  | Intramedullary edema of right femur and<br>pubis with a periosteal reaction, muscle<br>reaction 1 |  |  |
|--|--|--|--|--|-----------------------------------------|--|---------------------------------------------------------------------------------------------------|--|--|

ADHD: Attention Deficit Hyperactivity Disorder; BMTR: bone marrow transplant recipient; CRP: C reactive protein; DD: developmental delay; ESR: erythrocyte sedimentation rate; FU: follow-up; IV intravenous; MRI: magnetic resonance imaging; ND: neurological diseases; PH pulmonary hypertension; RX: radiograph; TIRO: transfusion iron related overload; Δ : deficiency
